# Supplementary material for: Ion-Induced Synthesis of Alginate Fibroid Hydrogel for Heavy Metal Ions Removal
Source: Front Chem. 2020 Jan 10;7:905. doi: 10.3389/fchem.2019.00905 (PMC6966715; doi:10.3389/fchem.2019.00905)
Supplement: Supplementary file 1 [file Table_1.DOCX]

**Ion-induced synthesis of alginate fibroid hydrogel for heavy metal ions removal**

**Chuncai Kong1, Xueqi Zhao1, Yingju Li1, Sen Yang1, Yongmei Chen2*, Zhimao Yang1***

1School of Science, MOE Key Laboratory for Non-Equilibrium Synthesis and Modulation of Condensed Matter, State Key Laboratory for Mechanical Behavior of Materials and Xi’an Jiaotong University Suzhou Academy, Xi’an Jiaotong University, Xi’an 710049, Shaanxi, P. R. China

2College of Bioresources Chemical and Materials Engineering, Shaanxi University of Science & Technology, Key Laboratory of Leather Cleaner Production, China National Light Industry, Xi’an 710021, P. R. China

*** Correspondence:**Corresponding Author
chenym@mail.xjtu.edu.cn (Y.M. Chen)

zmyang@mail.xjtu.edu.cn (Z.M. Yang)


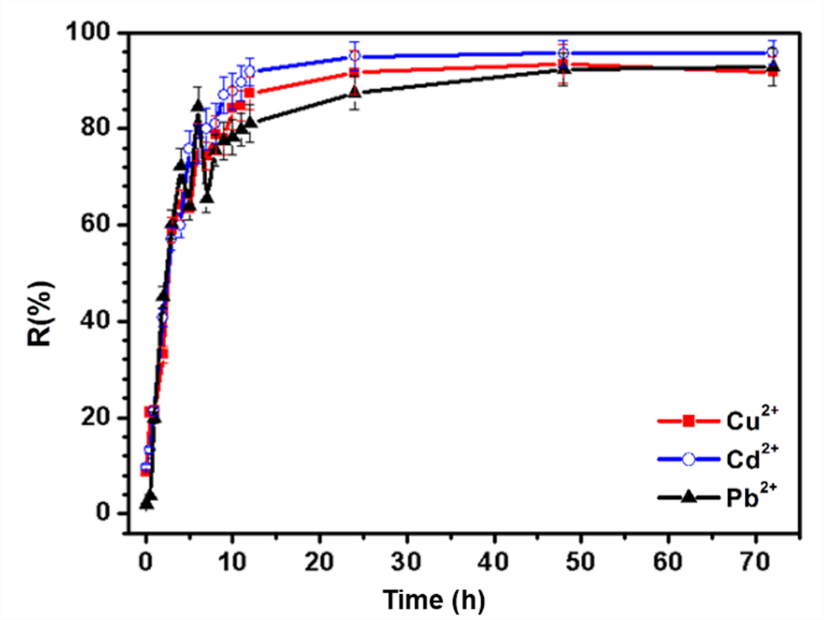


FIGURE S1 Effect of time on the removal ratios of SAFH for Cu2+, Cd2+ and Pb2+.

TABLE S1 Comparison of saturated adsorption capacities (mg·g-1) of different materials

| Adsorbents | Cu2+ | Cd2+ | Pb2+ | Reference |
| --- | --- | --- | --- | --- |
| SAFH | 315.92 | 232.35 | 465.22 | This work |
| PVA/PAA gel | — | 115.88 | 194.99 | (Chu et al. 2015) |
| PSA-GO gel | — | 238.30 | — | (Xu et al. 2015) |
| biochar | 34.20 | 28.10 | 153.10 | (Wang et al. 2015) |
| AMPS | 100.86 | 134.66 | 120.14 | (Ozay et al. 2009) |
| Fraxinus excelsior tree leaves | 33.10 | 67.20 | 172.00 | (Sangi et al. 2008) |
| PAM/TGA/DHBA | — | 294.08 | 452.25 | (Mohammadi et al. 2017) |
| PAAm/TGA |  | 291.73 | 345.00 | (Mohammadi, Shangbin, Berkland,Liang 2017) |
| GO-DPA | 347.00 | 253.00 | 360.00 | (Zare-Dorabei et al. 2016) |

TABLE S2 Kinetic rate constants and calculated adsorption capacity of heavy metal ions

| Metal ions | *Qe,exp* (mg·g-1) | Pseudo-first-order model | | | Pseudo-second-order model | | |
| --- | --- | --- | --- | --- | --- | --- | --- |
| *R2* | *Qe,1* (mg·g-1) | *K1* (min-1) | *R2* | *Qe,2* (mg·g-1) | *K2*(g·(mg•min)-1) |
| Cu2+ | 24.34 | 0.156 | 3.48 | 0.013 | 0.956 | 28.72 | 0.065 |
| Cd2+ | 33.64 | 0.860 | 9.29 | 0.034 | 0.937 | 39.56 | 0.051 |
| Pb2+ | 23.66 | 0.232 | 2.14 | 0.053 | 0.912 | 34.00 | 0.014 |

TABLE S3 Partition and selectivity coefficients of competitive adsorption on heavy metal ions

| Metal ions | *Kd* | | | *α* | | |
| --- | --- | --- | --- | --- | --- | --- |
| Cu2+ | Cd2+ | Pb2+ | Pb2+/ Cu2+ | Pb2+/ Cd2+ | Cu2+/ Cd2+ |
| Cu2+ + Cd2+ | 0.509 | 0.491 | — | — | — | 1.036 |
| Cu2+ + Pb2+ | 0.494 | — | 0.506 | 1.025 | — | — |
| Cd2+ + Pb2+ | — | 0.493 | 0.507 | — | 1.028 | — |
| Cu2+ + Cd2+ + Pb2+ | 0.331 | 0.312 | 0.357 | 1.079 | 1.144 | 1.059 |

**REFERENCES**

Chu L, Liu C, Zhou G, Xu R, Tang Y, Zeng Z, Luo S (2015) A double network gel as low cost and easy recycle adsorbent: Highly efficient removal of Cd(II) and Pb(II) pollutants from wastewater J Hazard Mater 300:153-160 https://doi.org/10.1016/j.jhazmat.2015.06.070

Li J, Tong J, Li X, Yang Z, Zhang Y, Diao G (2016) Facile microfluidic synthesis of copolymer hydrogel beads for the removal of heavy metal ions J Mater Sci 51:10375-10385 10.1007/s10853-016-0258-0

Meena AK, Mishra GK, Rai PK, Rajagopal C, Nagar PN (2005) Removal of heavy metal ions from aqueous solutions using carbon aerogel as an adsorbent J Hazard Mater 122:161-170 https://doi.org/10.1016/j.jhazmat.2005.03.024

Mohammadi Z, Shangbin S, Berkland C, Liang J-t (2017) Chelator-mimetic multi-functionalized hydrogel: Highly efficient and reusable sorbent for Cd, Pb, and As removal from waste water Chem Eng J 307:496-502 https://doi.org/10.1016/j.cej.2016.08.121

Ozay O, Ekici S, Baran Y, Aktas N, Sahiner N (2009) Removal of toxic metal ions with magnetic hydrogels Water Res 43:4403-4411 https://doi.org/10.1016/j.watres.2009.06.058

Sangi MR, Shahmoradi A, Zolgharnein J, Azimi GH, Ghorbandoost M (2008) Removal and recovery of heavy metals from aqueous solution using Ulmus carpinifolia and Fraxinus excelsior tree leaves J Hazard Mater 155:513-522 https://doi.org/10.1016/j.jhazmat.2007.11.110

Wang H, Gao B, Wang S, Fang J, Xue Y, Yang K (2015) Removal of Pb(II), Cu(II), and Cd(II) from aqueous solutions by biochar derived from KMnO4 treated hickory wood Bioresource Technol 197:356-362 https://doi.org/10.1016/j.biortech.2015.08.132

Xu R, Zhou G, Tang Y, Chu L, Liu C, Zeng Z, Luo S (2015) New double network hydrogel adsorbent: Highly efficient removal of Cd(II) and Mn(II) ions in aqueous solution Chem Eng J 275:179-188 https://doi.org/10.1016/j.cej.2015.04.040

Yan H, Dai J, Yang Z, Yang H, Cheng R (2011) Enhanced and selective adsorption of copper(II) ions on surface carboxymethylated chitosan hydrogel beads Chem Eng J 174:586-594 https://doi.org/10.1016/j.cej.2011.09.064

Zare-Dorabei R, Ferdowsi SM, Barzin A, Tadjarodi A (2016) Highly efficient simultaneous ultrasonic-assisted adsorption of Pb(II), Cd(II), Ni(II) and Cu (II) ions from aqueous solutions by graphene oxide modified with 2,2′-dipyridylamine: Central composite design optimization Ultrason Sonochem 32:265-276 https://doi.org/10.1016/j.ultsonch.2016.03.020

Zhang M, Song L, Jiang H, Li S, Shao Y, Yang J, Li J (2017) Biomass based hydrogel as an adsorbent for the fast removal of heavy metal ions from aqueous solutions J Mater Chem 5:3434-3446 10.1039/C6TA10513K

Zhang W et al. (2018) A facile synthesis of core-shell/bead-like poly (vinyl alcohol)/alginate@PAM with good adsorption capacity, high adaptability and stability towards Cu(Ⅱ) removal Chem Eng J 351:462-472 https://doi.org/10.1016/j.cej.2018.06.129
